# Supplementary material for: High Throughput Screening of the NatureBank ‘Marine Collection’ in a Haemonchus Bioassay Identifies Anthelmintic Activity in Extracts from a Range of Sponges from Australian Waters
Source: MDPI journal article supplement (doi:10.3390/molecules26195846), 2021-09-27
Supplement: s1 [file s1]

## Supplementary Materials

# High Throughput Screening of the NatureBank 'Marine Collection' in a *Haemonchus* Bioassay Identifies Anthelmintic Activity in Extracts from a Range of Sponges from Australian Waters

Aya C. Taki<sup>1</sup>, Joseph J. Byrne<sup>1</sup>, Abdul Jabbar<sup>1</sup>, Kah Yean Lum<sup>2</sup>, Sasha Hayes<sup>2</sup>, Russell S. Addison<sup>2</sup>, Kelsey S. Ramage<sup>2</sup>, Andreas Hofmann<sup>1</sup>, Merrick G. Ekins<sup>2,3</sup>, Tao Wang<sup>1</sup>, Bill C. H. Chang<sup>1</sup>, Rohan A. Davis<sup>2</sup> and Robin B. Gasser<sup>1\*</sup>

<sup>1</sup> Department of Veterinary Biosciences, Melbourne Veterinary School, Faculty of Veterinary and Agricultural Sciences, The University of Melbourne, Parkville, Victoria 3010, Australia; aya.taki@unimelb.edu.au (A.C.T.); byrnej1@unimelb.edu.au (J.J.B.); jabbara@unimelb.edu.au (A.J.); a.hofmann@structuralchemistry.org (A.H.); tao.wang1@unimelb.edu.au (T.W.); bchang@yourgene.com.tw (B.C.H.C.)

<sup>2</sup> Griffith Institute for Drug Discovery, School of Environment and Science, Griffith University, Brisbane, Queensland 4111, Australia; k.lum@griffith.edu.au (K.Y.L.); sasha.hayes2@griffithuni.edu.au (S.H.); r.addison@griffith.edu.au (R.S.A.); kelsey.ramage@griffithuni.edu.au (K.S.R.); r.davis@griffith.edu.au (R.A.D.)

<sup>3</sup> Queensland Museum, South Brisbane, Queensland 4101, Australia; merrick.ekins@qm.qld.gov.au (M.G.E.).

\* Correspondence: robinbg@unimelb.edu.au (R.B.G.)

## Contents

- S1**  $^1\text{H}$  NMR (800 MHz) Spectra of *Callyspongia* sp. Extracts in DMSO- $d_6$
- S2**  $^1\text{H}$  NMR (800 MHz) Spectra of *Clathria* sp. Extracts in DMSO- $d_6$
- S3**  $^1\text{H}$  NMR (800 MHz) Spectra of *Coscinoderma mathewsi* Extracts in DMSO- $d_6$
- S4**  $^1\text{H}$  NMR (800 MHz) Spectra of *Haliclona* sp. Extracts in DMSO- $d_6$
- S5**  $^1\text{H}$  NMR (800 MHz) Spectra of *Oceanapia* sp. Extracts in DMSO- $d_6$
- S6**  $^1\text{H}$  NMR (800 MHz) Spectra of *Phyllospongia* sp. Extracts in DMSO- $d_6$
- S7**  $^1\text{H}$  NMR (800 MHz) Spectra of *Psammocinia* sp. Extracts in DMSO- $d_6$
- S8**  $^1\text{H}$  NMR (800 MHz) Spectra of *Rhabdastrella globostellata* Extracts in DMSO- $d_6$
- S9**  $^1\text{H}$  NMR (800 MHz) Spectra of *Didemnum* sp. Extracts in DMSO- $d_6$
- S10**  $^1\text{H}$  NMR (800 MHz) Spectra of *Acanthophora muscoides*, *Agelas axifera*, *Ceratopsion clavatum*, *Chalinula* sp. and *Cinachyrella (Raphidotethya) enigmatica* Extracts in DMSO- $d_6$
- S11**  $^1\text{H}$  NMR (800 MHz) Spectra of *Citronia* sp., *Cymbastela coralliophila*, *Desmacella* sp., *Echinochalina (Protophlitaspongia)* sp. and *Endectyon* sp. Extracts in DMSO- $d_6$
- S12**  $^1\text{H}$  NMR (800 MHz) Spectra of *Erylus amissus*, *Fascaplysinopsis reticulata*, *Gelliodes* sp., *Ianthella flabelliformis* and *Leucetta microraphis* Extracts in DMSO- $d_6$
- S13**  $^1\text{H}$  NMR (800 MHz) Spectra of *Petromica (Chaladesma) pacifica*, *Polyfibrospongia flabellifera*, *Polycarpa aurata* and *Sarcophyton cherbonnieri* Extracts in DMSO- $d_6$

**S1**  $^1\text{H}$  NMR (800 MHz) Spectra of *Callyspongia* sp. Extracts in  $\text{DMSO-}d_6^a$

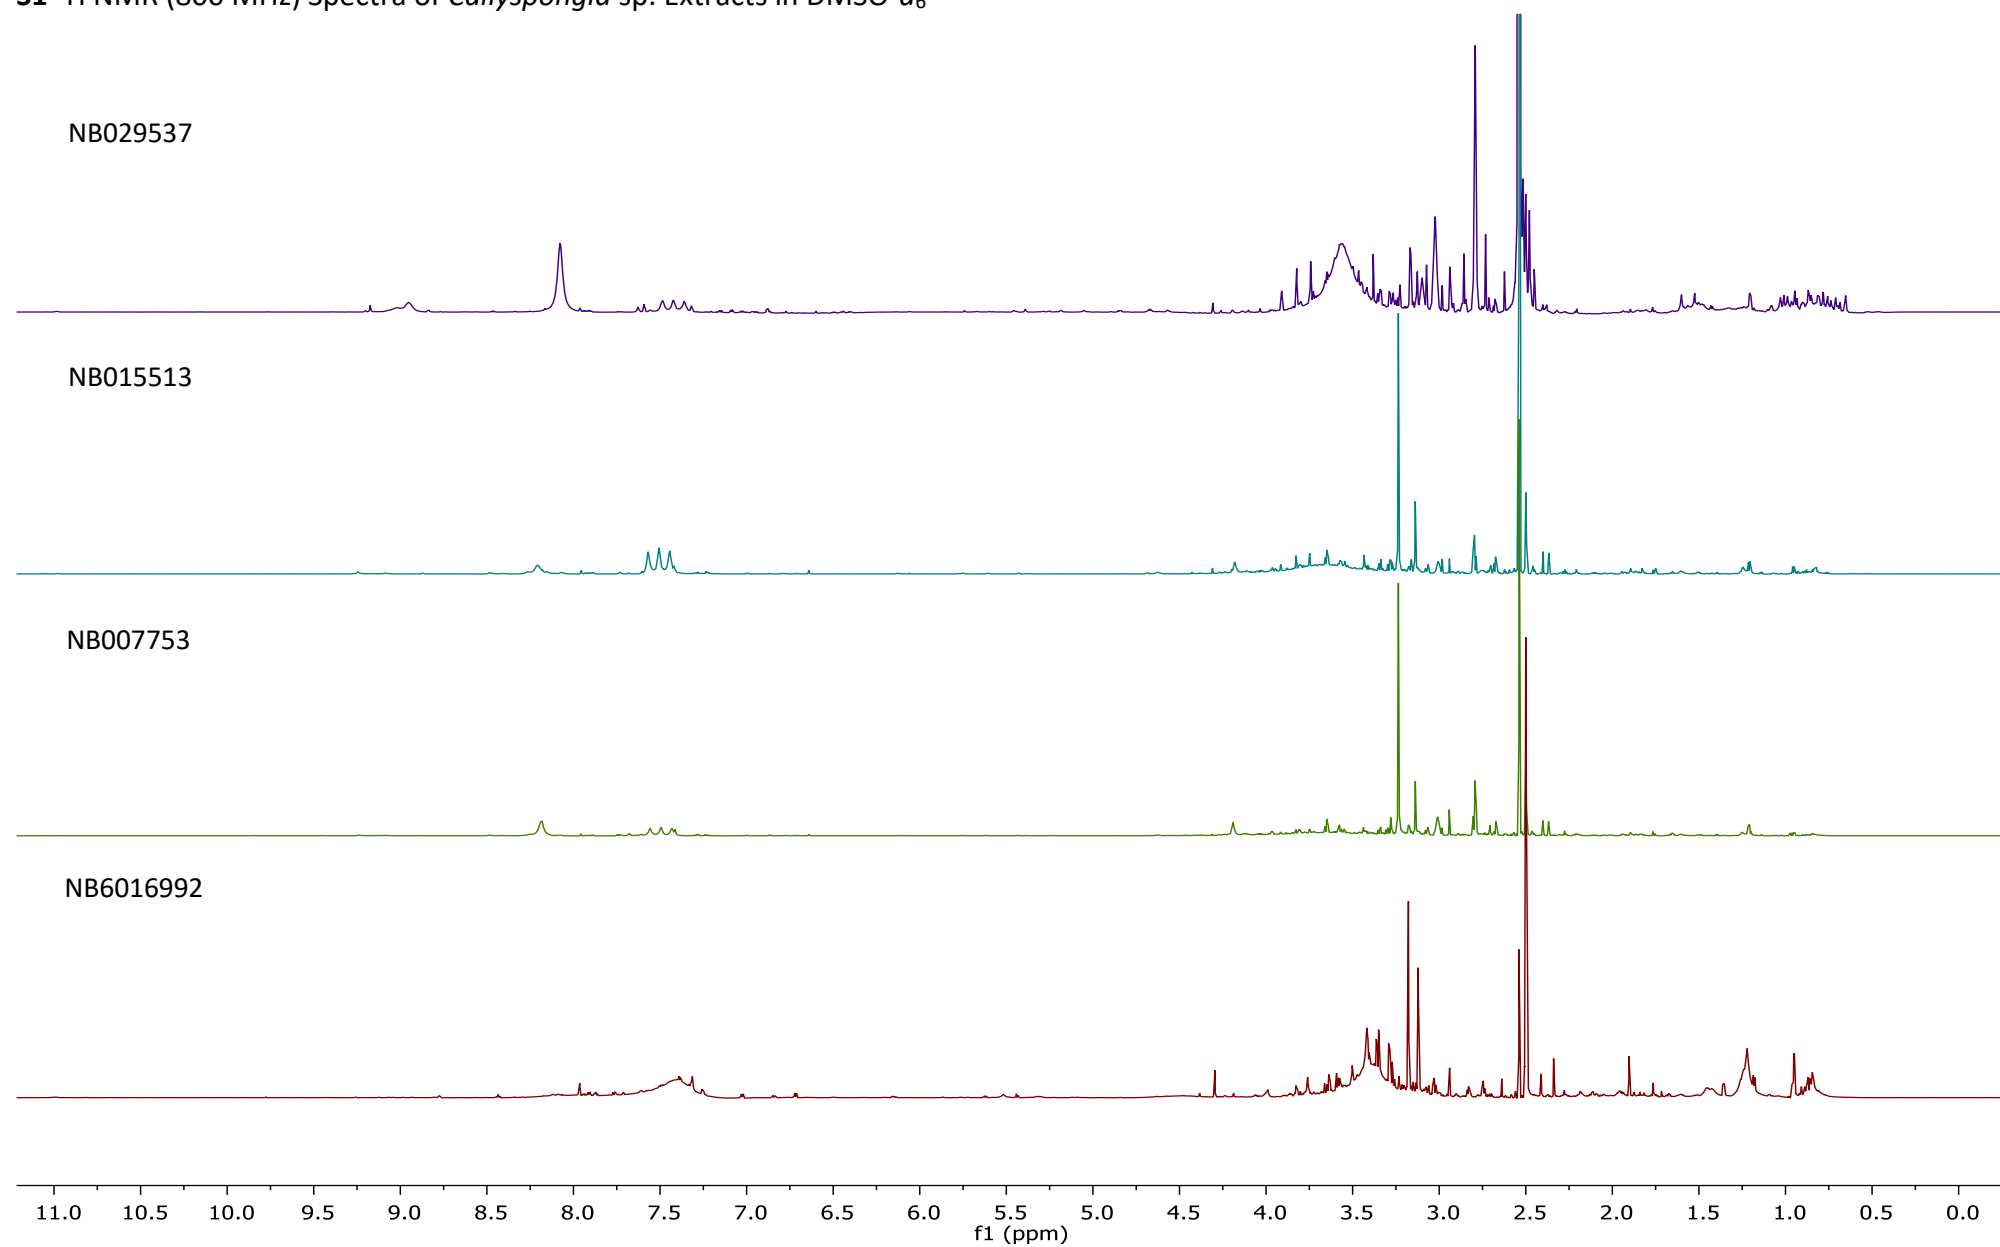

<sup>a</sup>Singlet at  $\delta_{\text{H}}$  2.54 represents DMSO residual peak

**S2**  $^1\text{H}$  NMR (800 MHz) Spectra of *Clathria* sp. Extracts in  $\text{DMSO}-d_6^a$

NB6014898

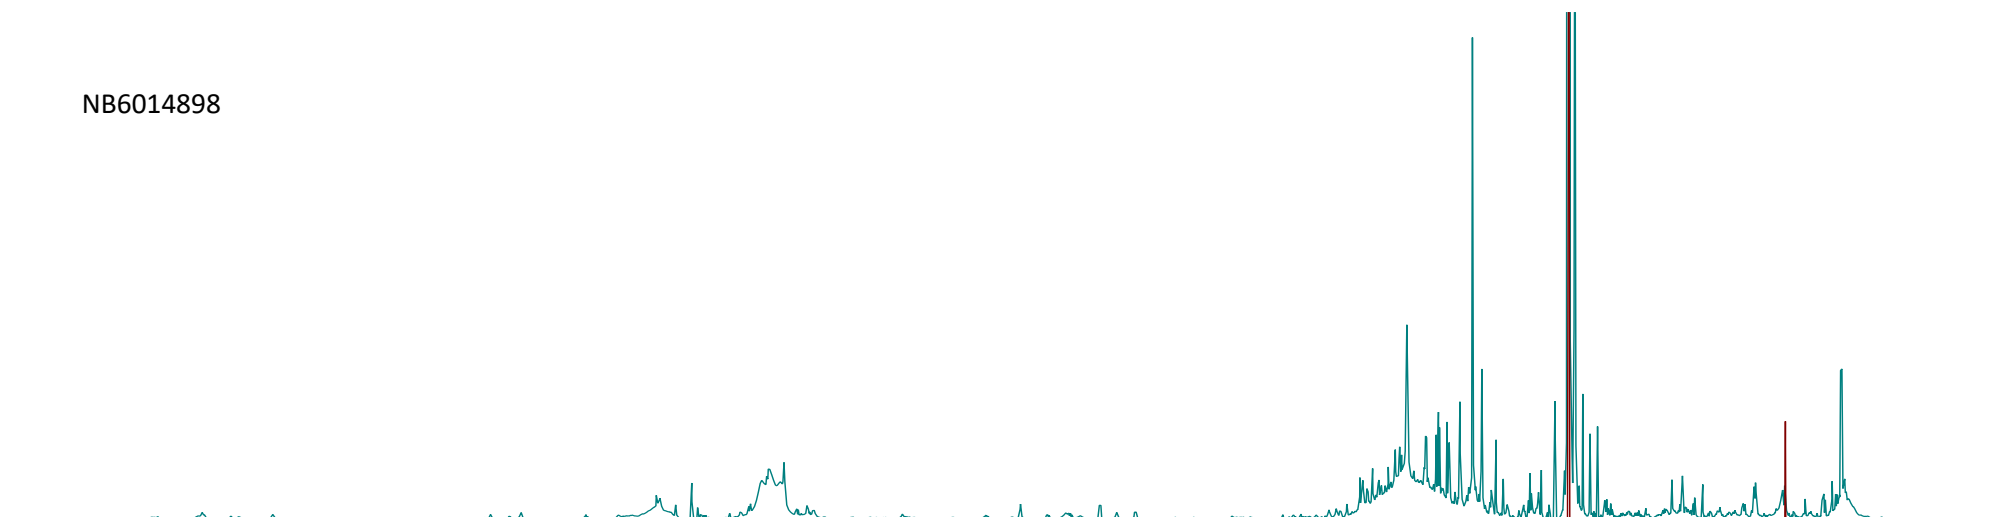

NB6020295

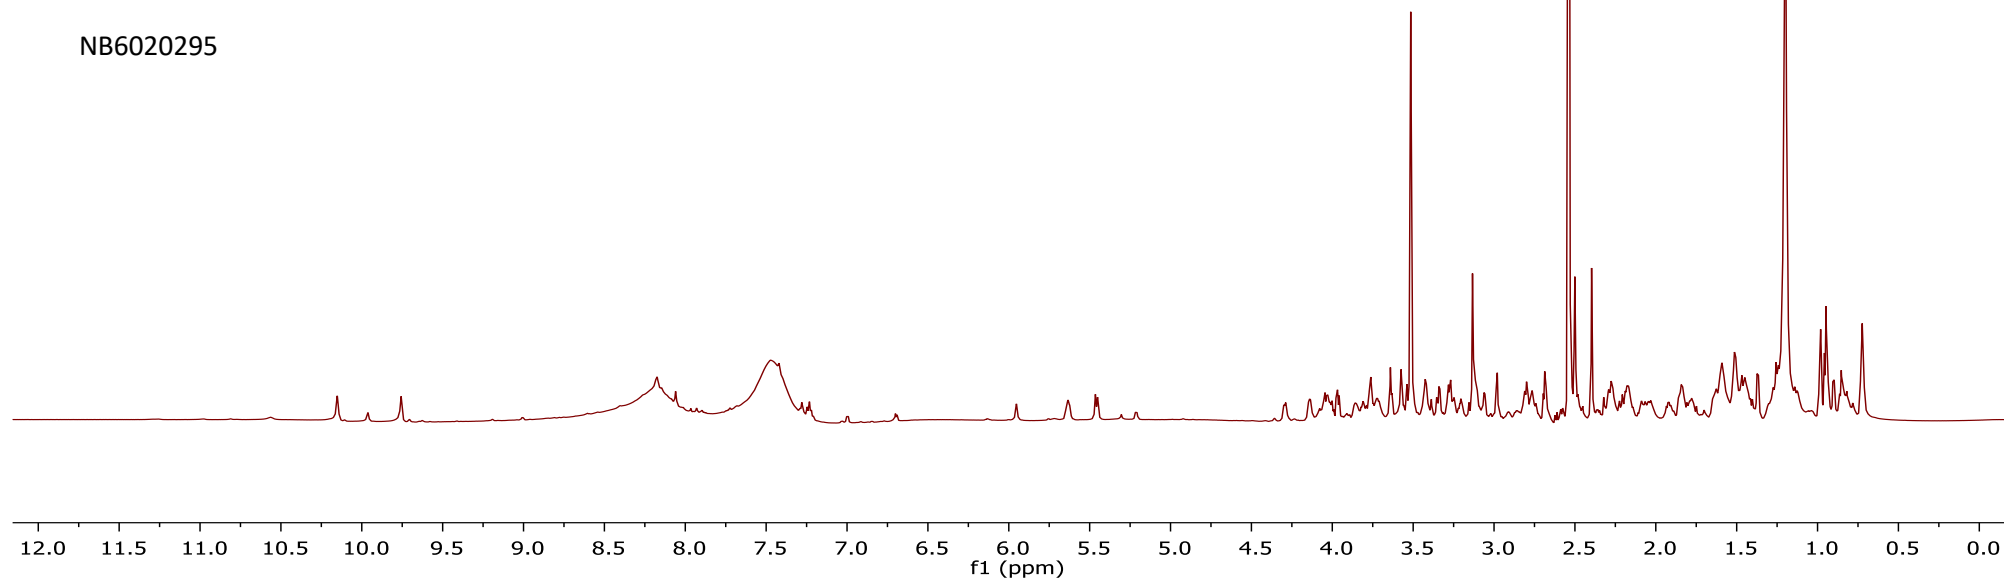

<sup>a</sup>Singlet at  $\delta_{\text{H}}$  2.54 represents DMSO residual peak

**S3**  $^1\text{H}$  NMR (800 MHz) Spectra of *Coscinoderma mathewsi* Extracts in  $\text{DMSO}-d_6^a$

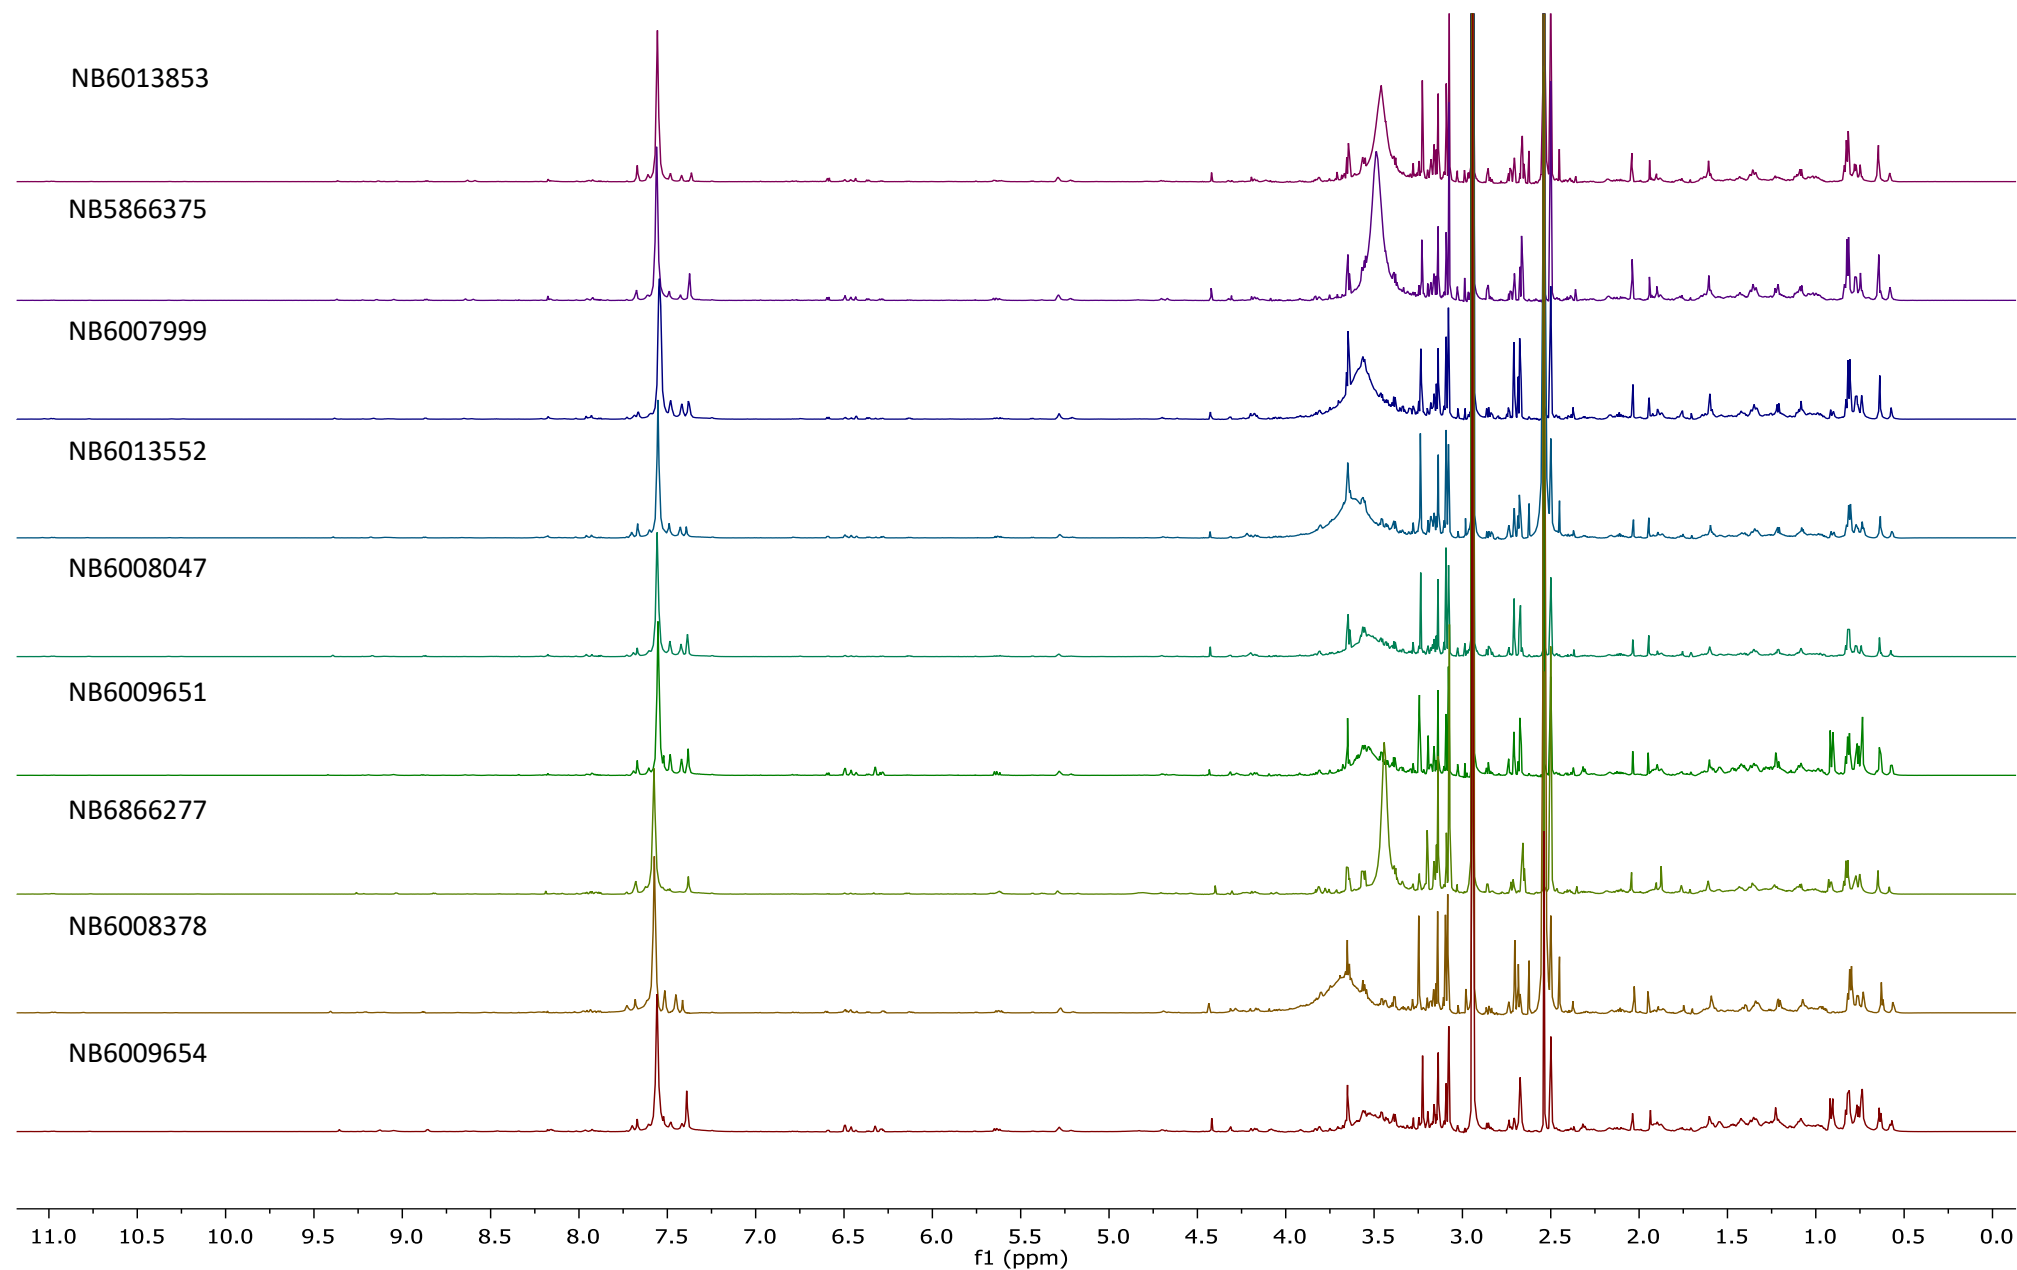

<sup>a</sup>Singlet at  $\delta_{\text{H}}$  2.54 represents DMSO residual peak

**S4**  $^1\text{H}$  NMR (800 MHz) Spectra of *Haliclona* sp. Extracts in  $\text{DMSO}-d_6^a$

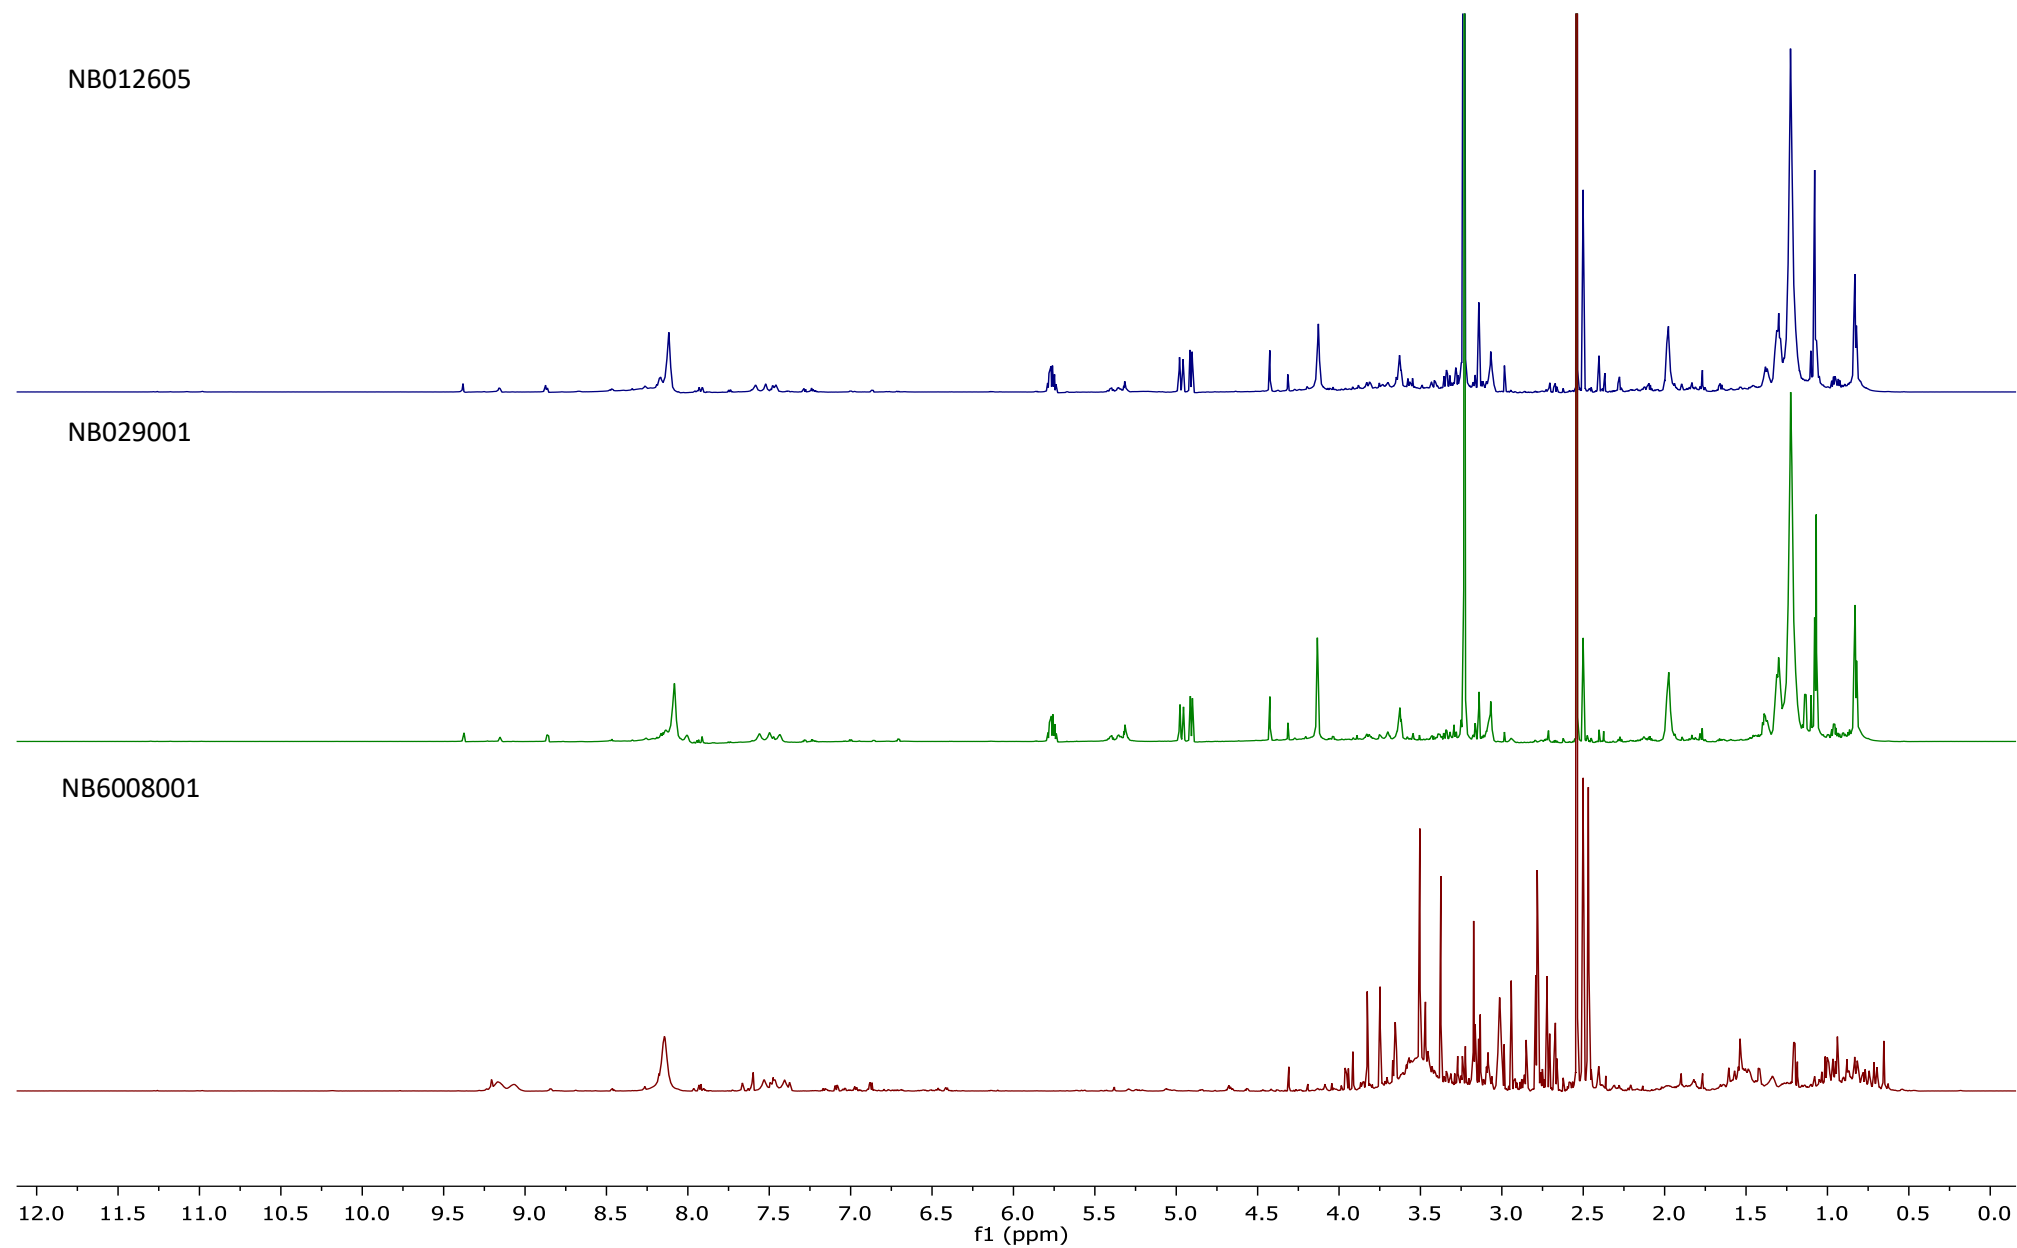

<sup>a</sup>Singlet at  $\delta_{\text{H}} 2.54$  represents DMSO residual peak

**S5**  $^1\text{H}$  NMR (800 MHz) Spectra of *Oceanapia* sp. Extracts in  $\text{DMSO}-d_6^a$

NB6009581

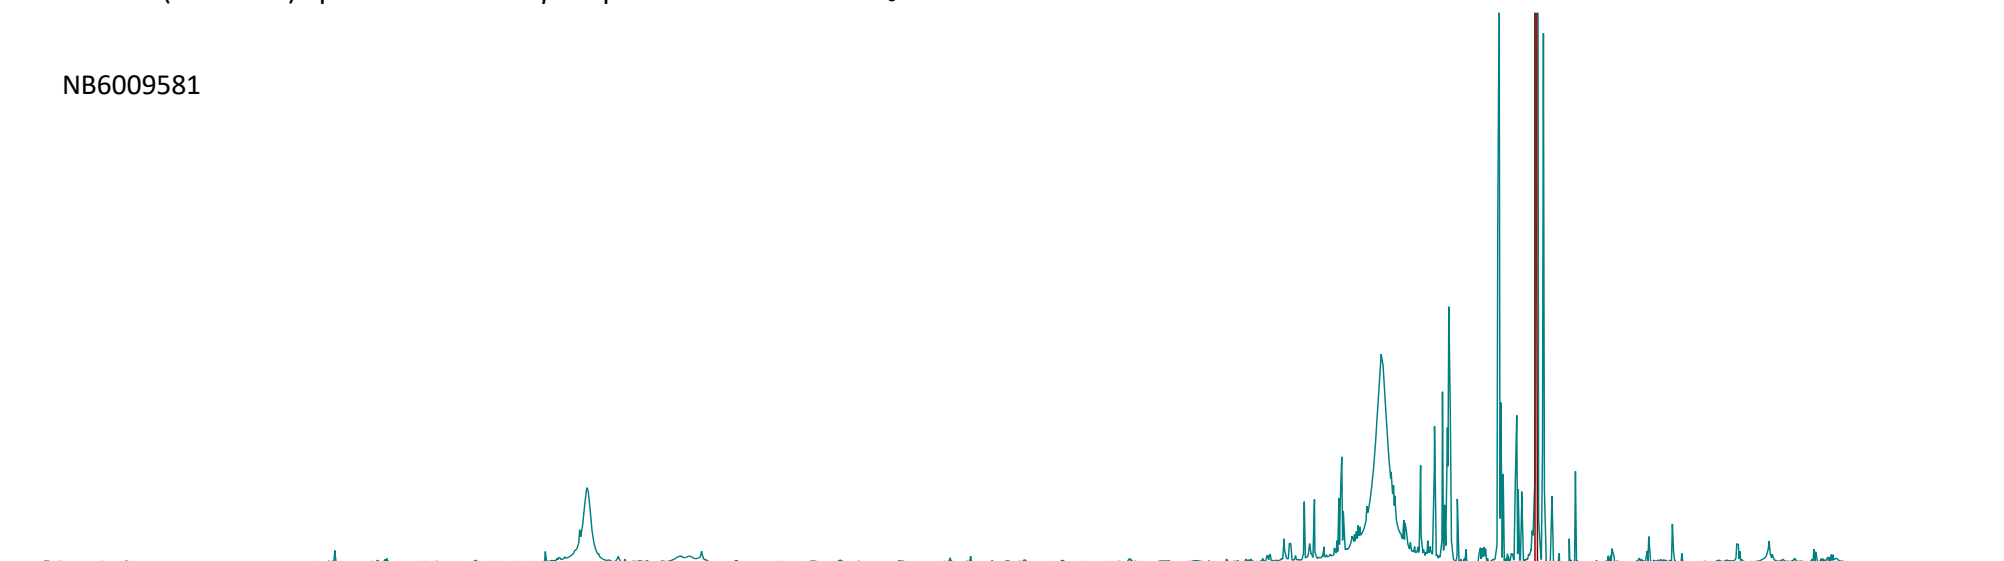

NB6009479

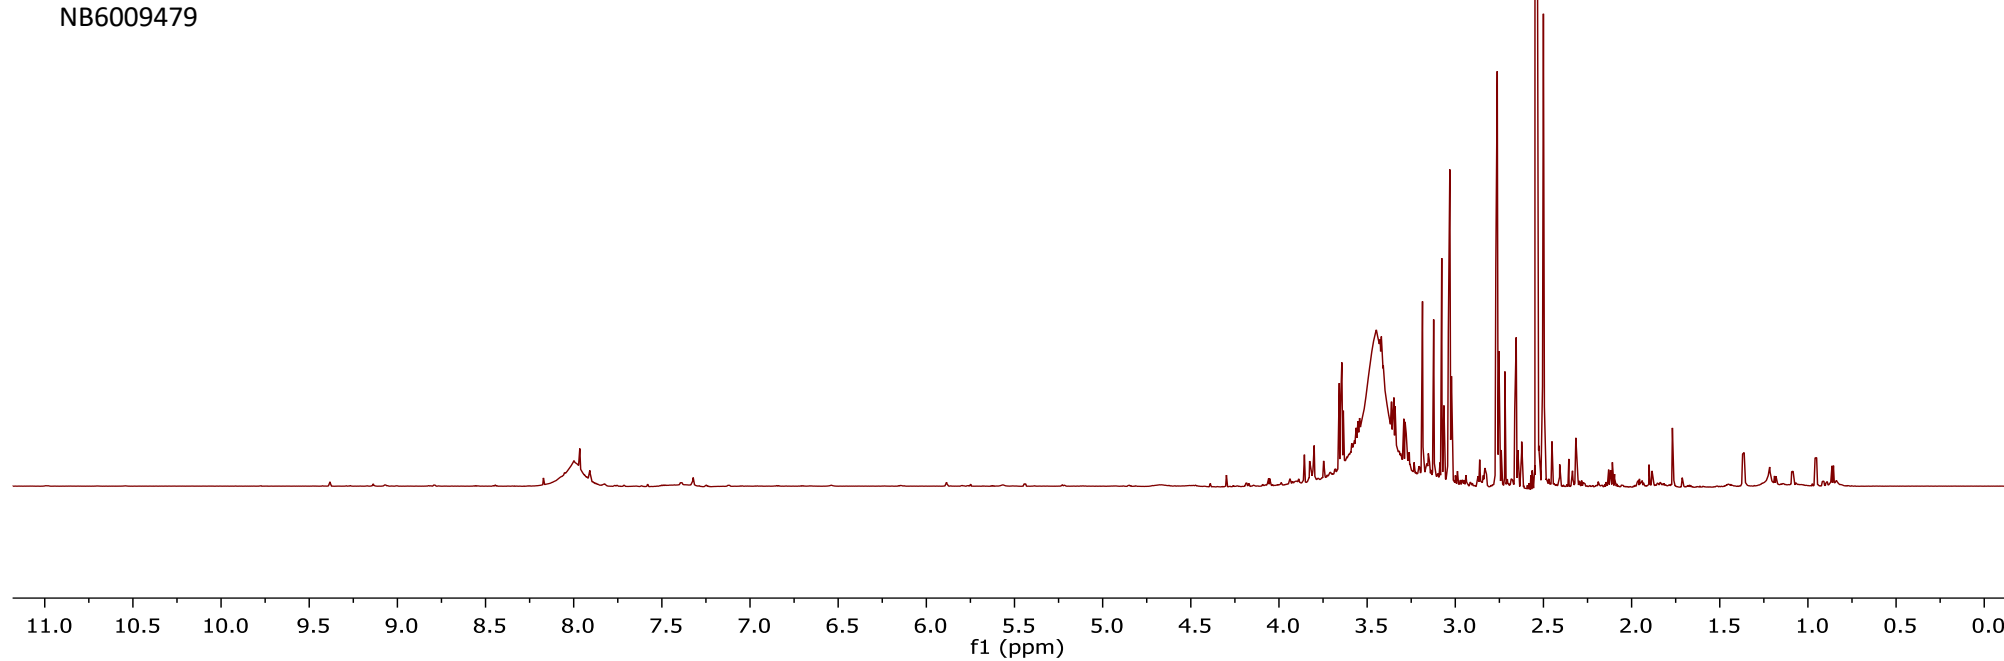

<sup>a</sup>Singlet at  $\delta_{\text{H}}$  2.54 represents DMSO residual peak

S6  $^1\text{H}$  NMR (800 MHz) Spectra of *Phyllospongia* sp. Extracts in  $\text{DMSO}-d_6^a$

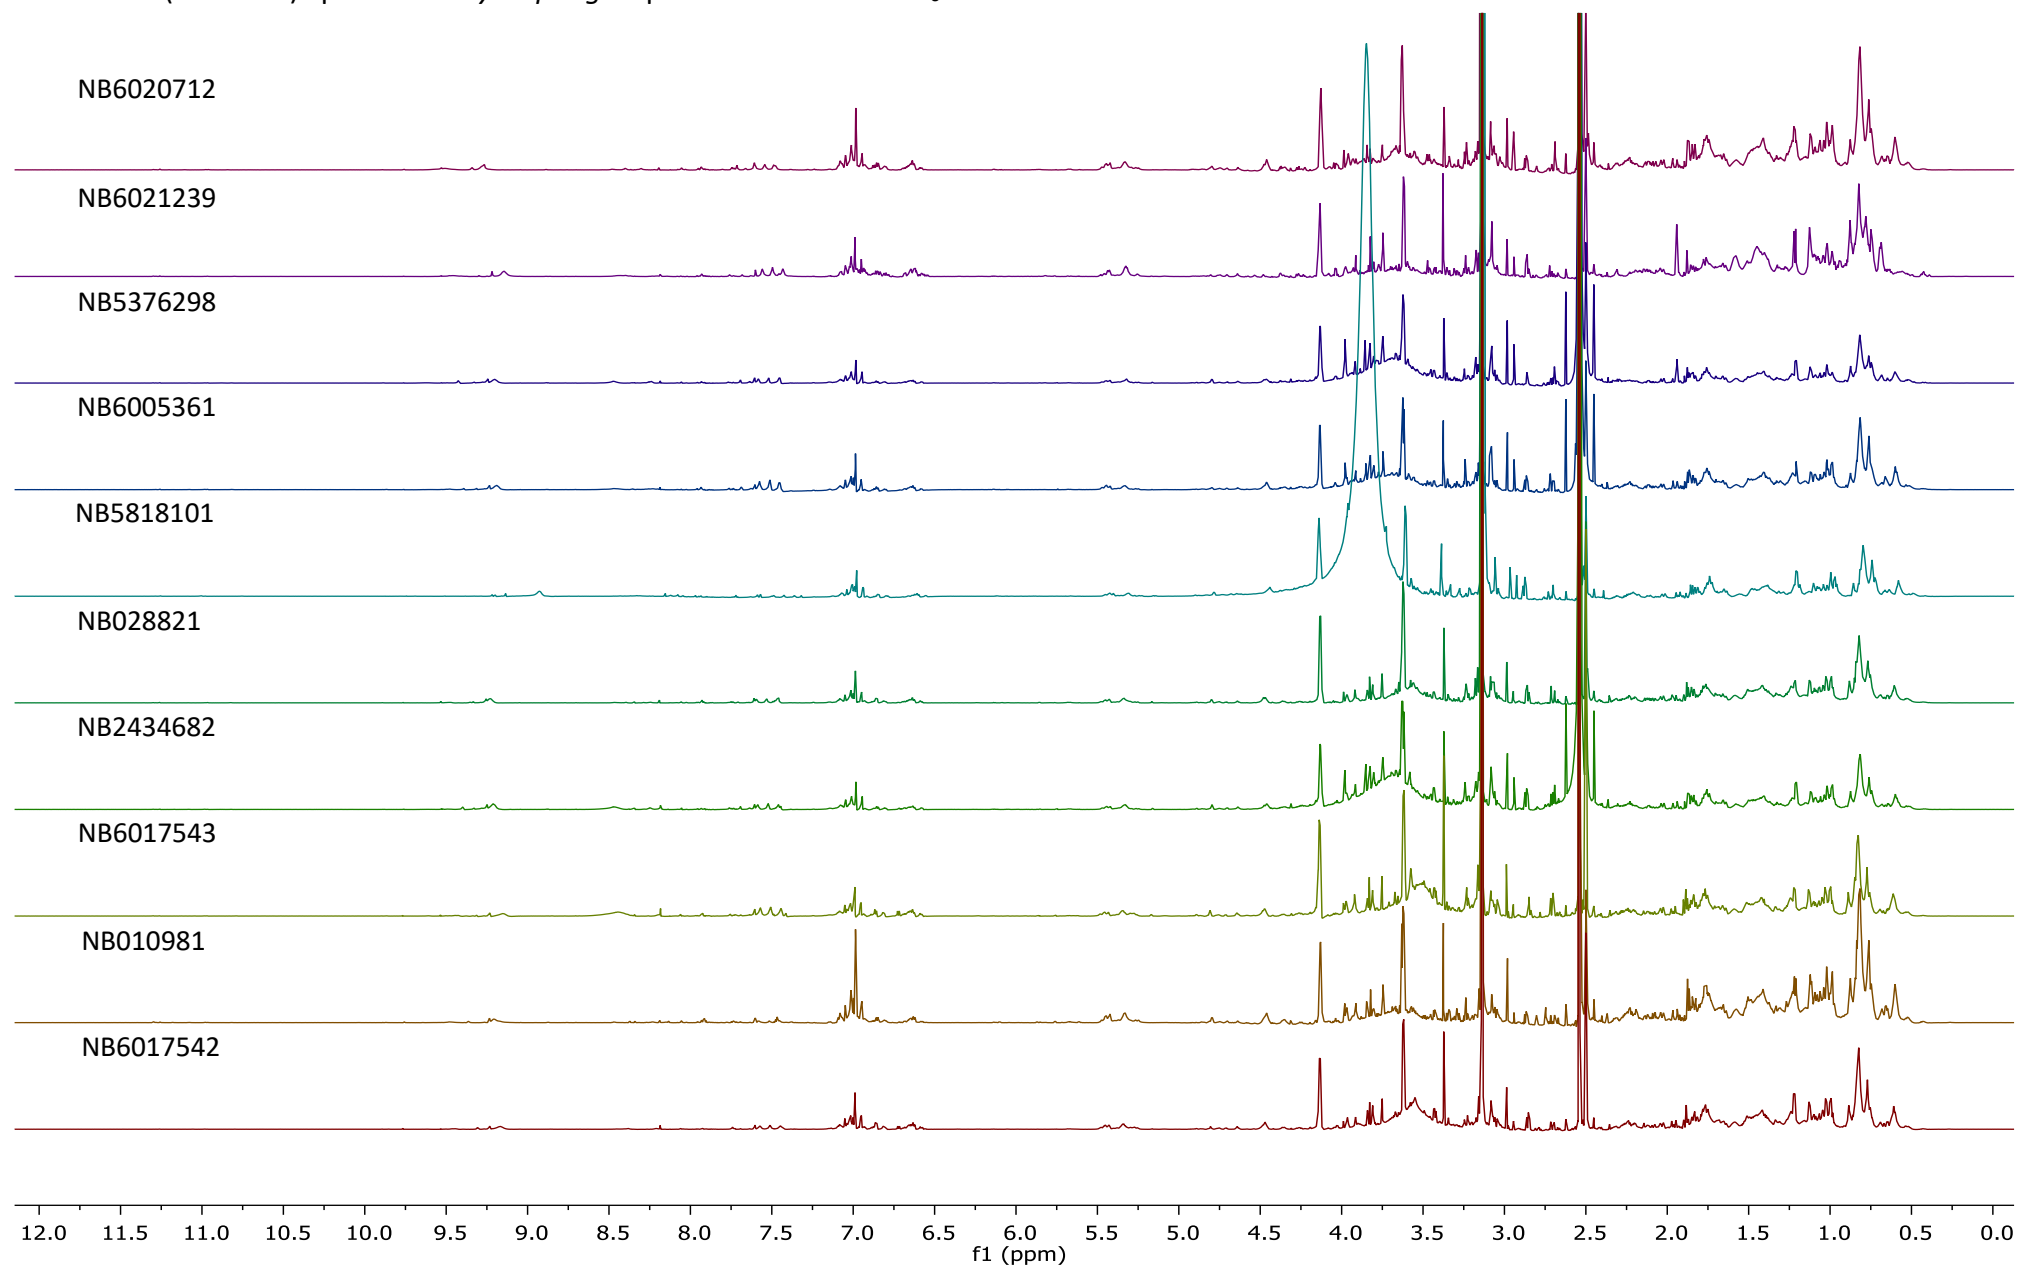

<sup>a</sup>Singlet at  $\delta_{\text{H}}$  2.54 represents DMSO residual peak

**S7**  $^1\text{H}$  NMR (800 MHz) Spectra of *Psammocinia* sp. Extracts in  $\text{DMSO}-d_6^a$

NB5867103

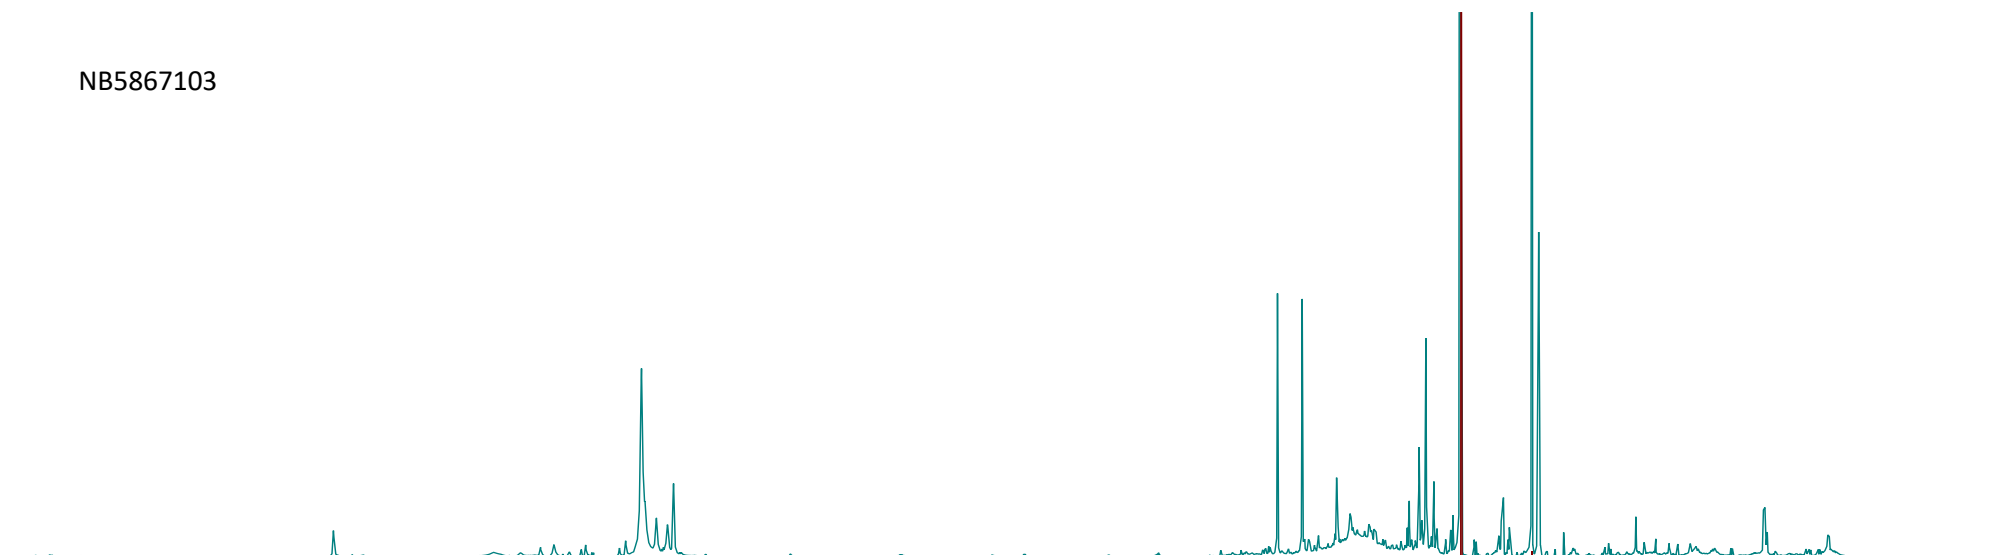

NB6005306

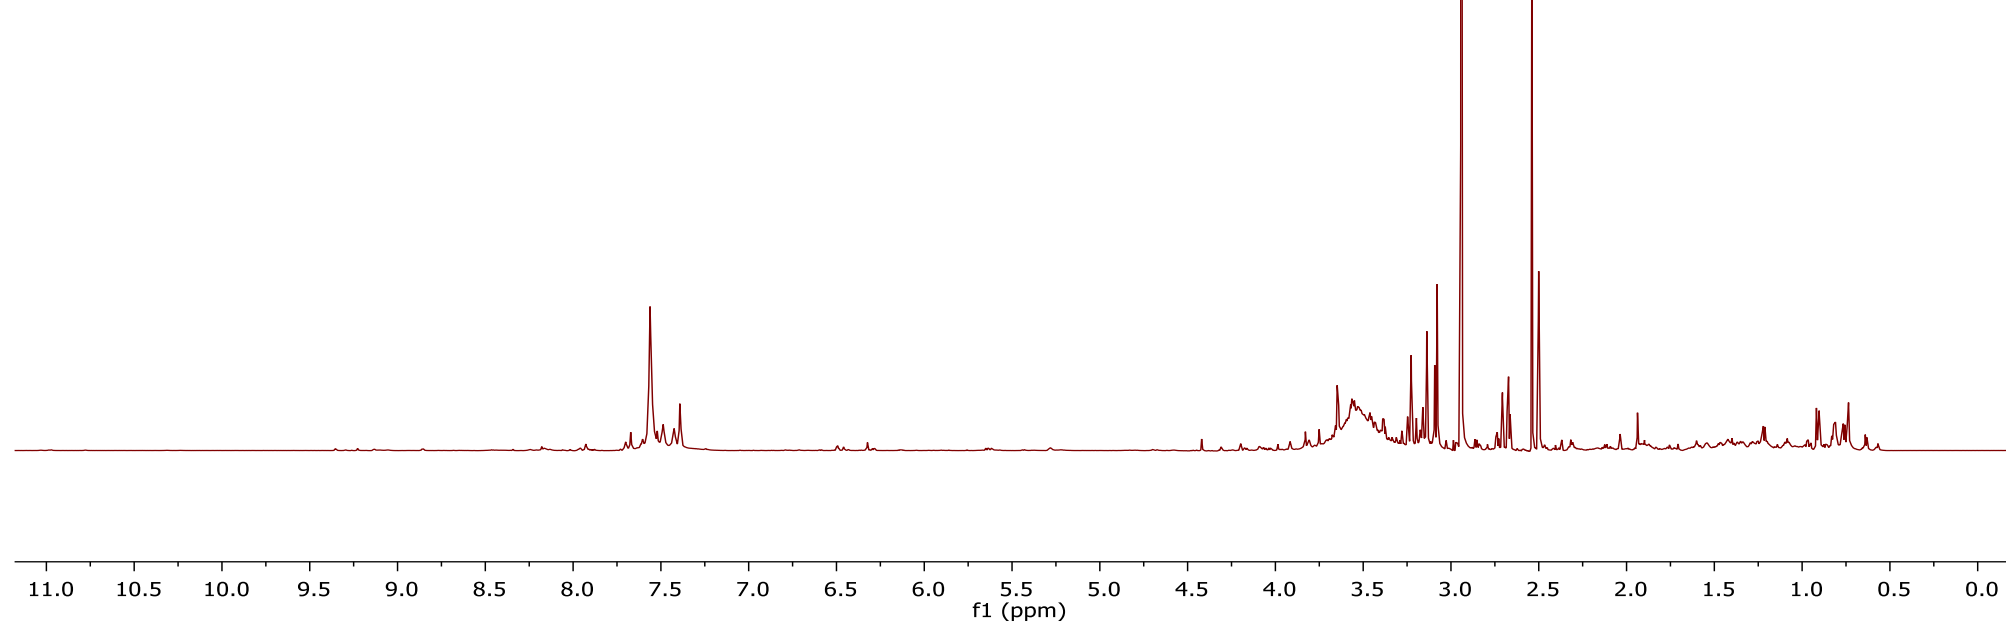

<sup>a</sup>Singlet at  $\delta_{\text{H}}$  2.54 represents DMSO residual peak

**S8**  $^1\text{H}$  NMR (800 MHz) Spectra of *Rhabdastrella globostellata* Extracts in  $\text{DMSO}-d_6^a$

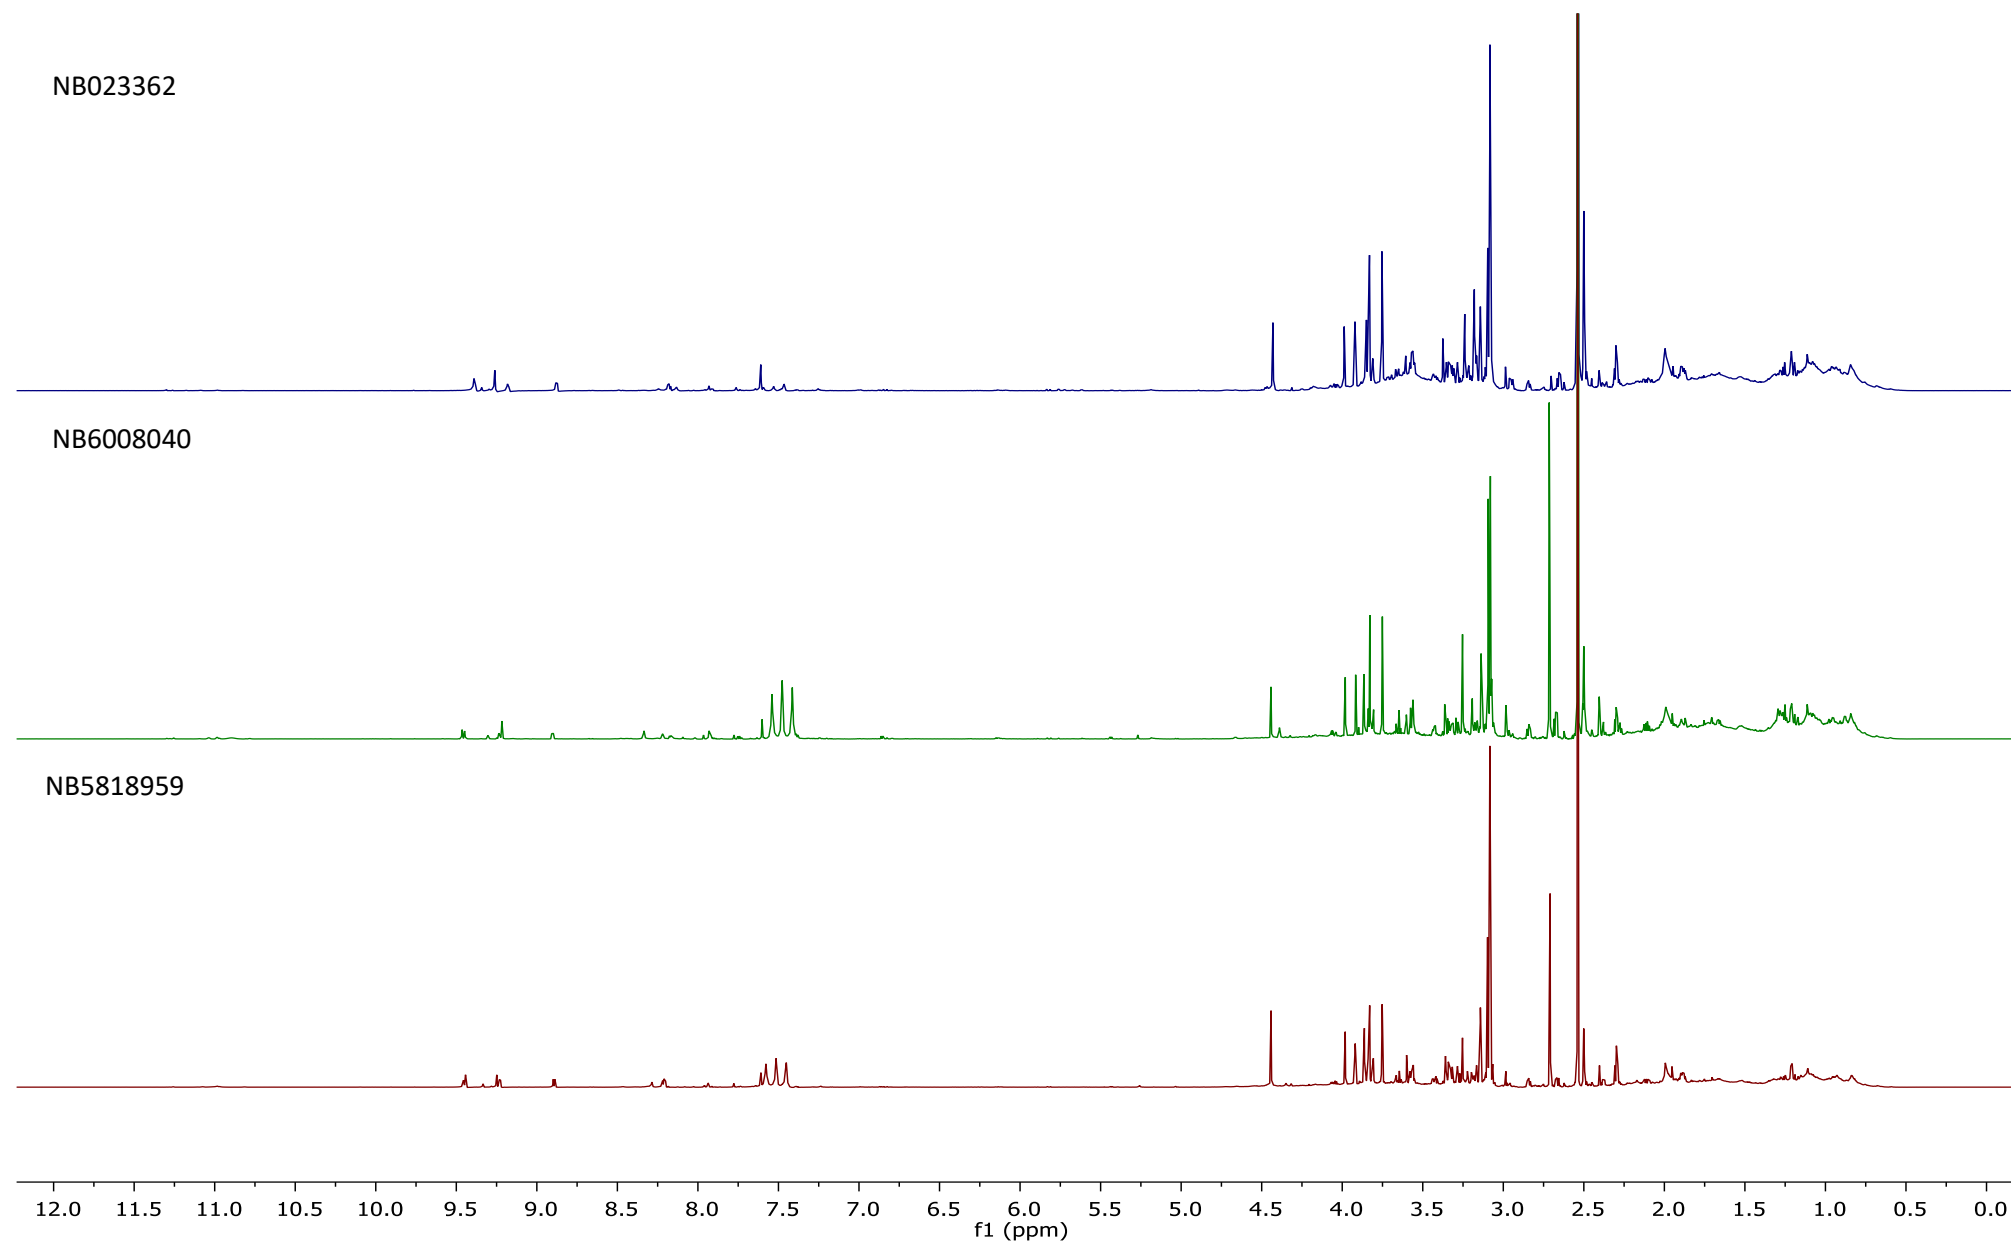

<sup>a</sup>Singlet at  $\delta_{\text{H}}$  2.54 represents DMSO residual peak

**S9**  $^1\text{H}$  NMR (800 MHz) Spectra of *Didemnum* sp. Extracts in  $\text{DMSO}-d_6^a$

NB6018071

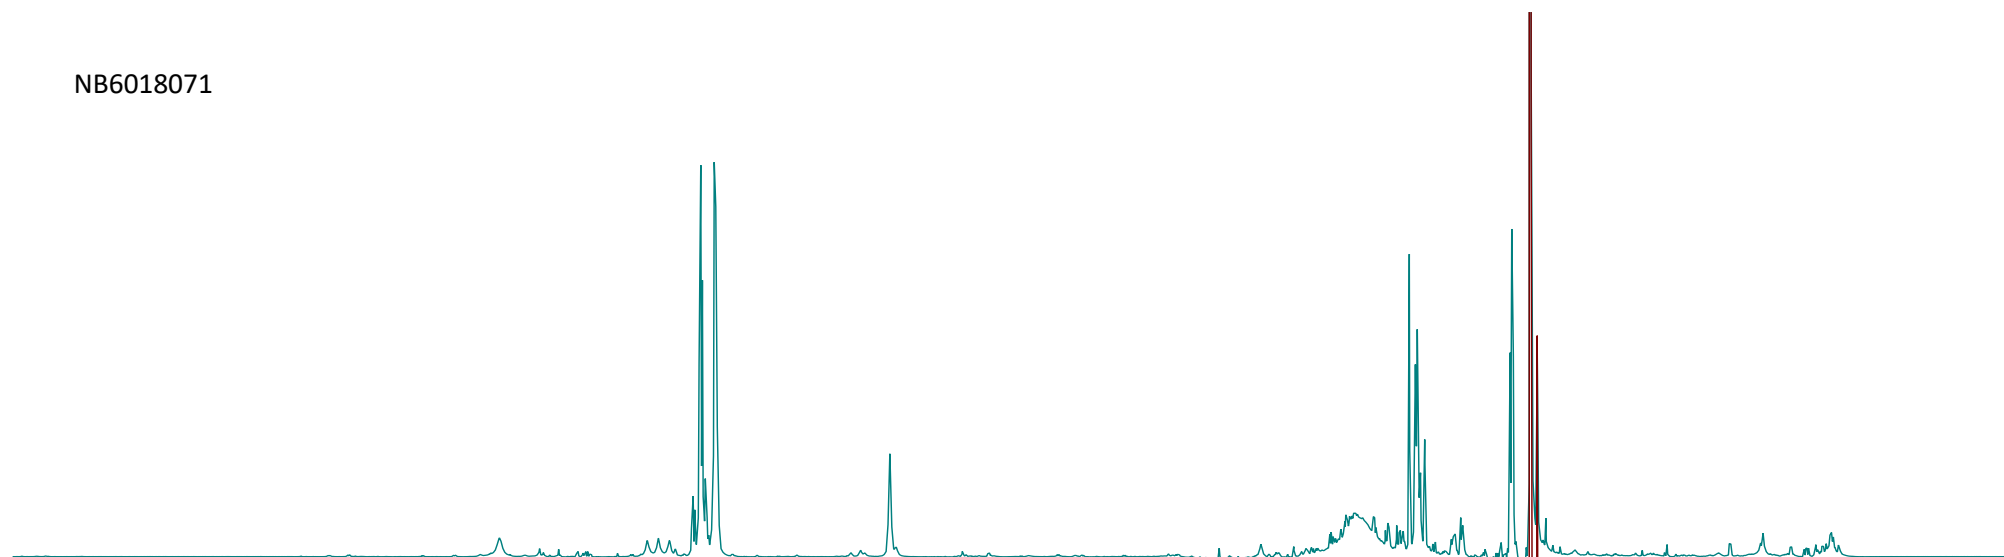

NB5867348

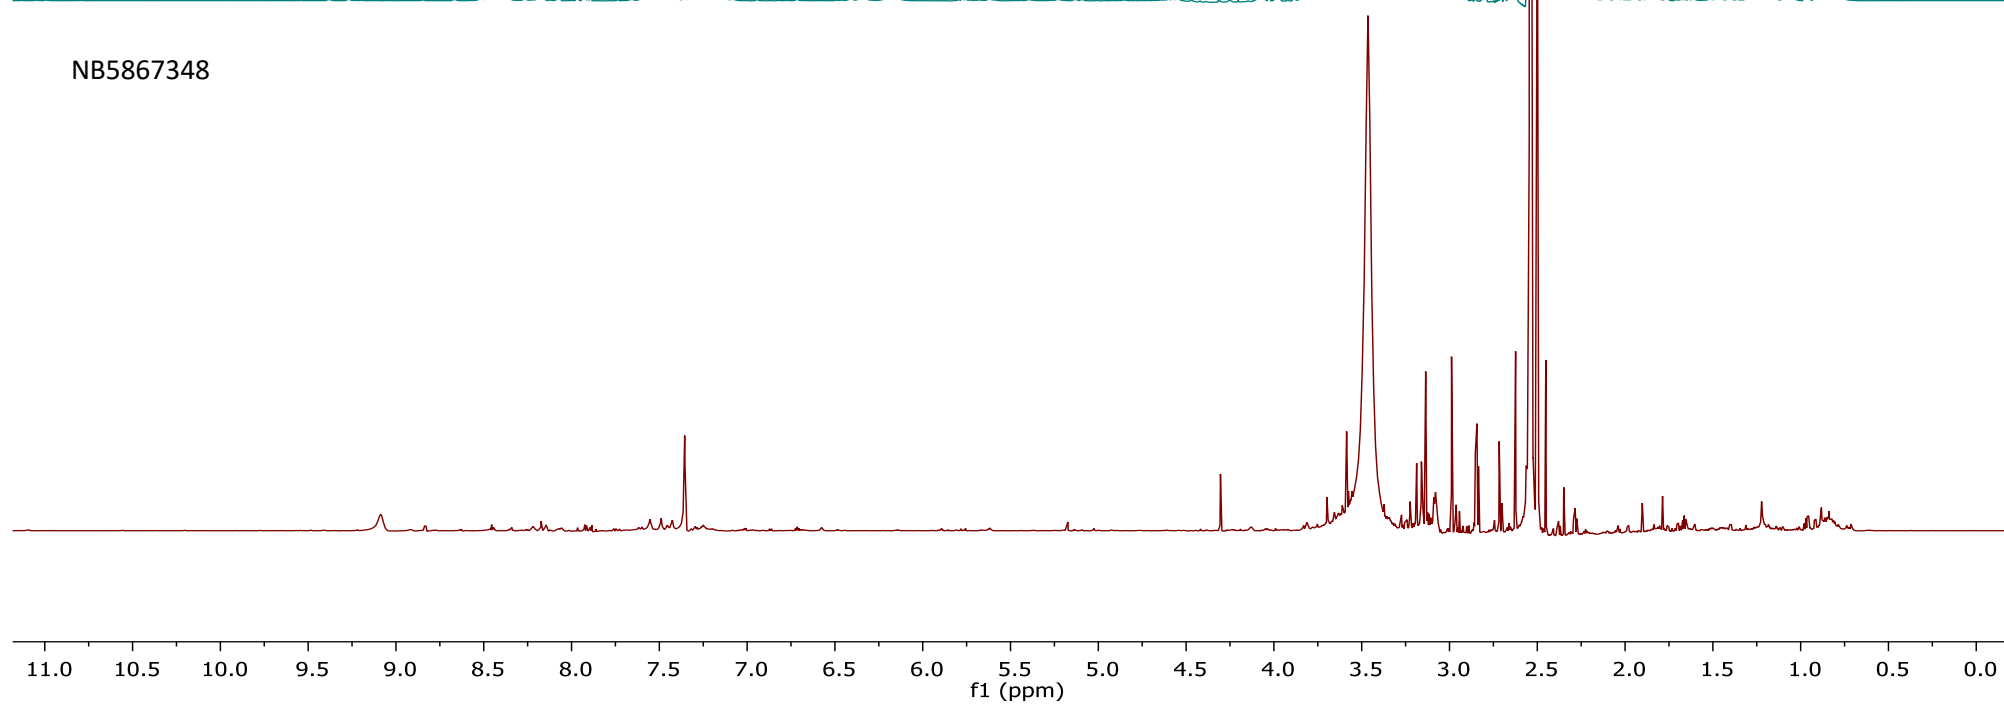

<sup>a</sup>Singlet at  $\delta_{\text{H}}$  2.54 represents DMSO residual peak

**S10**  $^1\text{H}$  NMR (800 MHz) Spectra of *Acanthophora muscoides*, *Agelas axifera*, *Ceratopsion clavatum*, *Chalinula* sp. and *Cinachyrella (Raphidotethya) enigmatica*  
Extracts in  $\text{DMSO}-d_6^a$

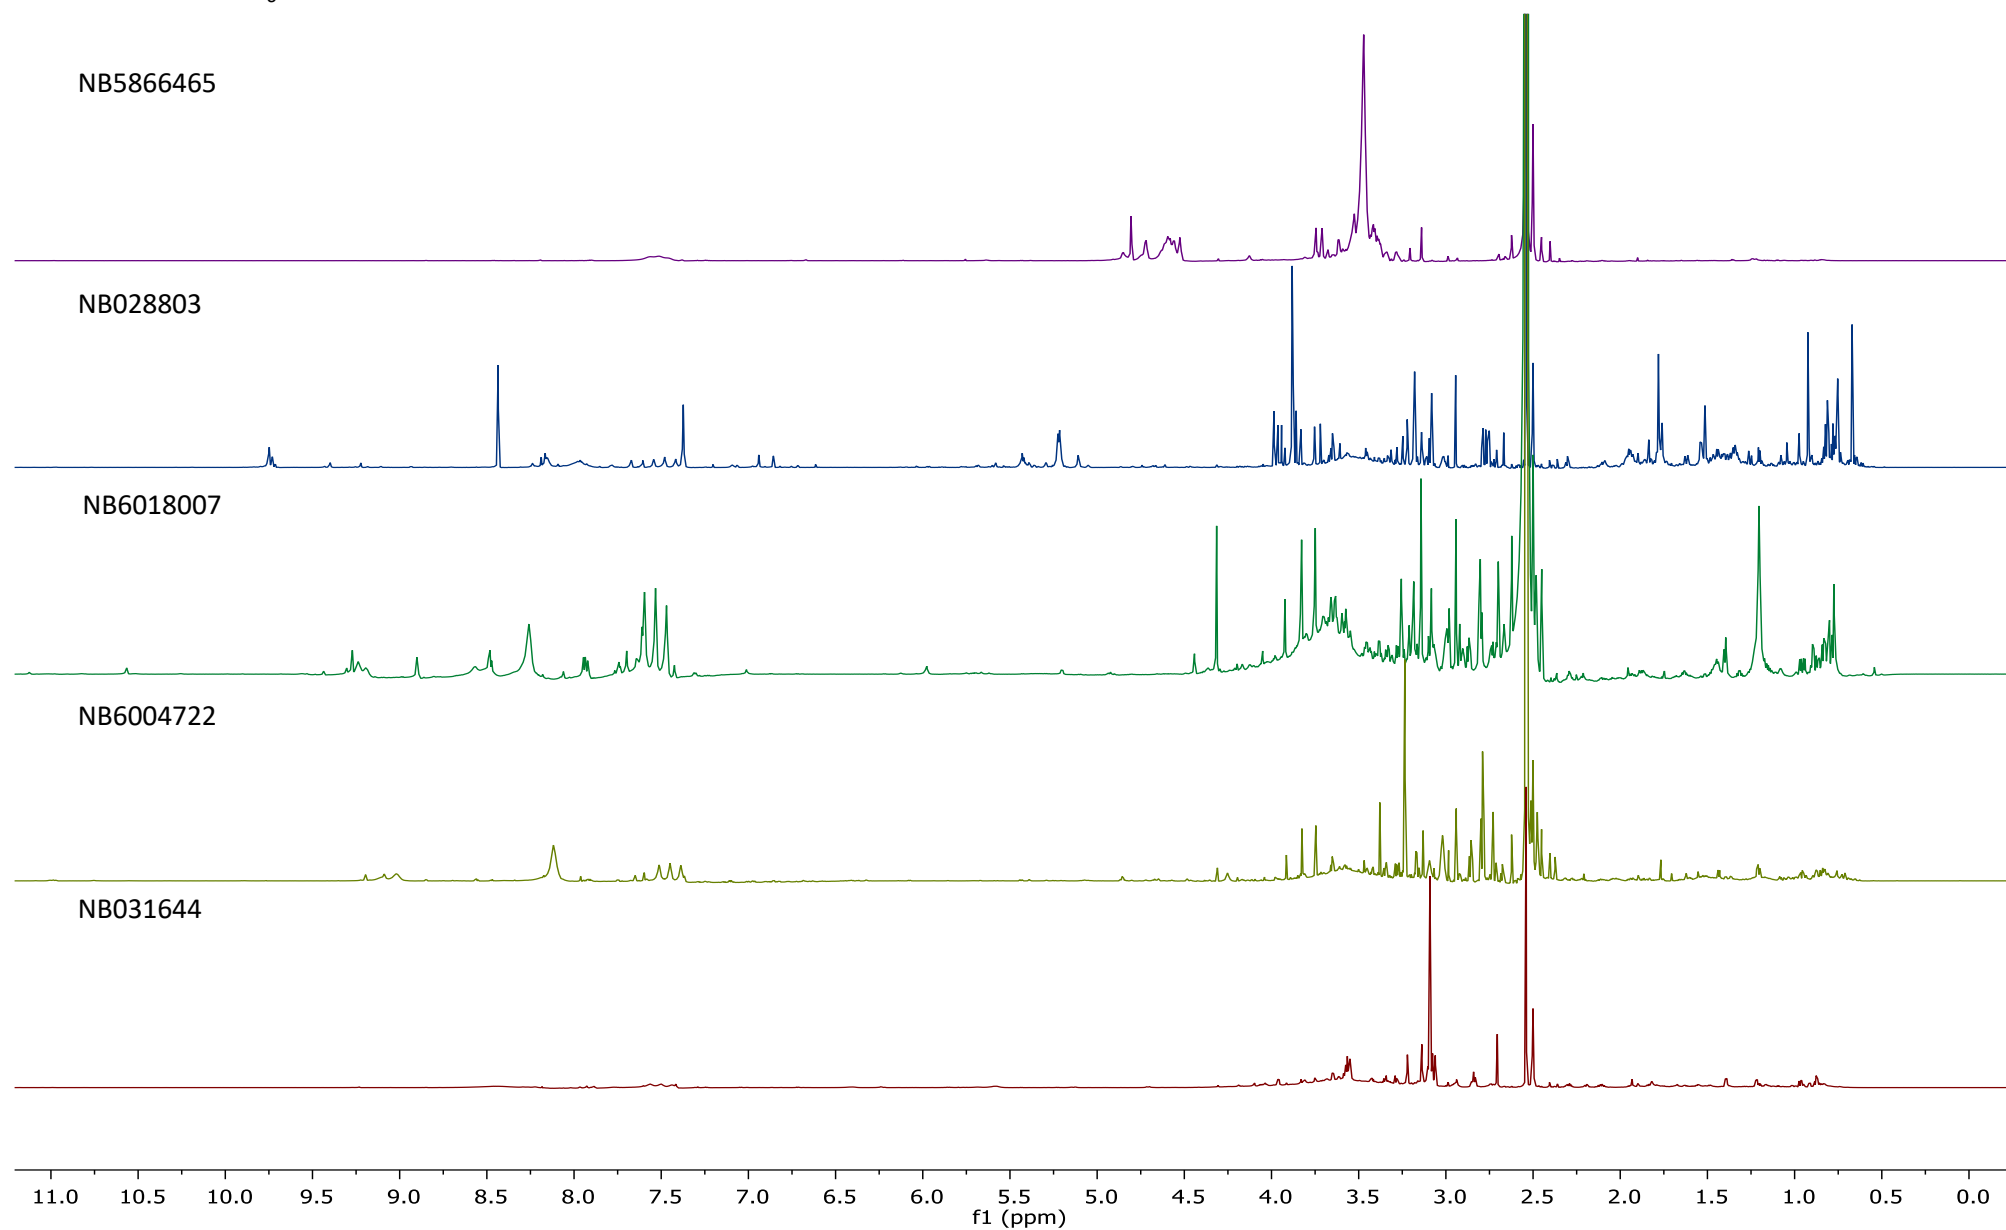

<sup>a</sup>Singlet at  $\delta_{\text{H}}$  2.54 represents DMSO residual peak

**S11**  $^1\text{H}$  NMR (800 MHz) Spectra of *Citronia* sp., *Cymbastela coralliophila*, *Desmacella* sp., *Echinochalina (Protophlitaspongia)* sp. and *Endectyon* sp. Extracts in  $\text{DMSO}-d_6^a$

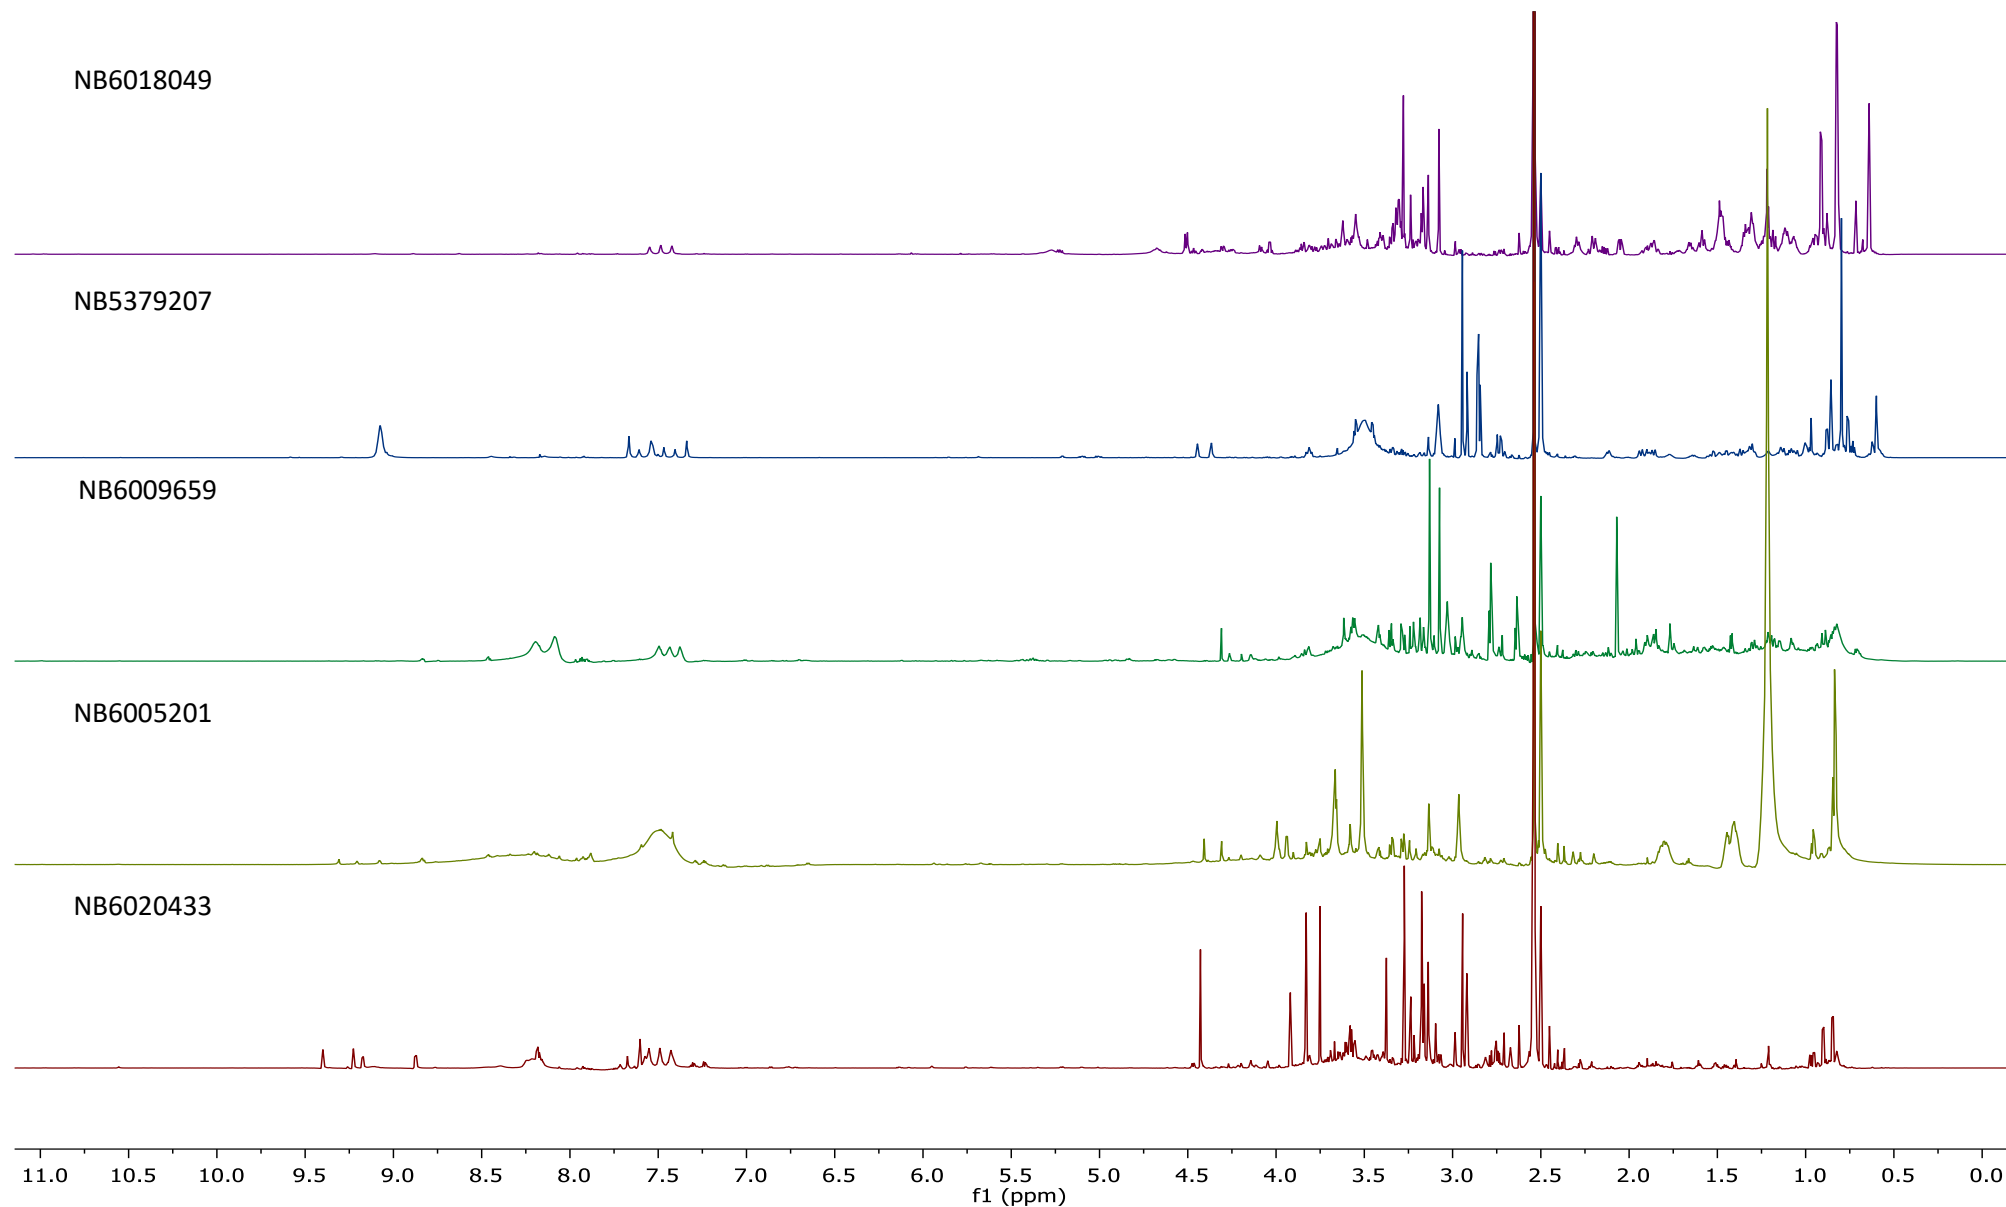

<sup>a</sup>Singlet at  $\delta_{\text{H}}$  2.54 represents DMSO residual peak

**S12**  $^1\text{H}$  NMR (800 MHz) Spectra of *Erylus amissus*, *Fascaplysinopsis reticulata*, *Gelliodes* sp., *Ianthella flabelliformis* and *Leucetta microraphis* Extracts in  $\text{DMSO}-d_6^a$

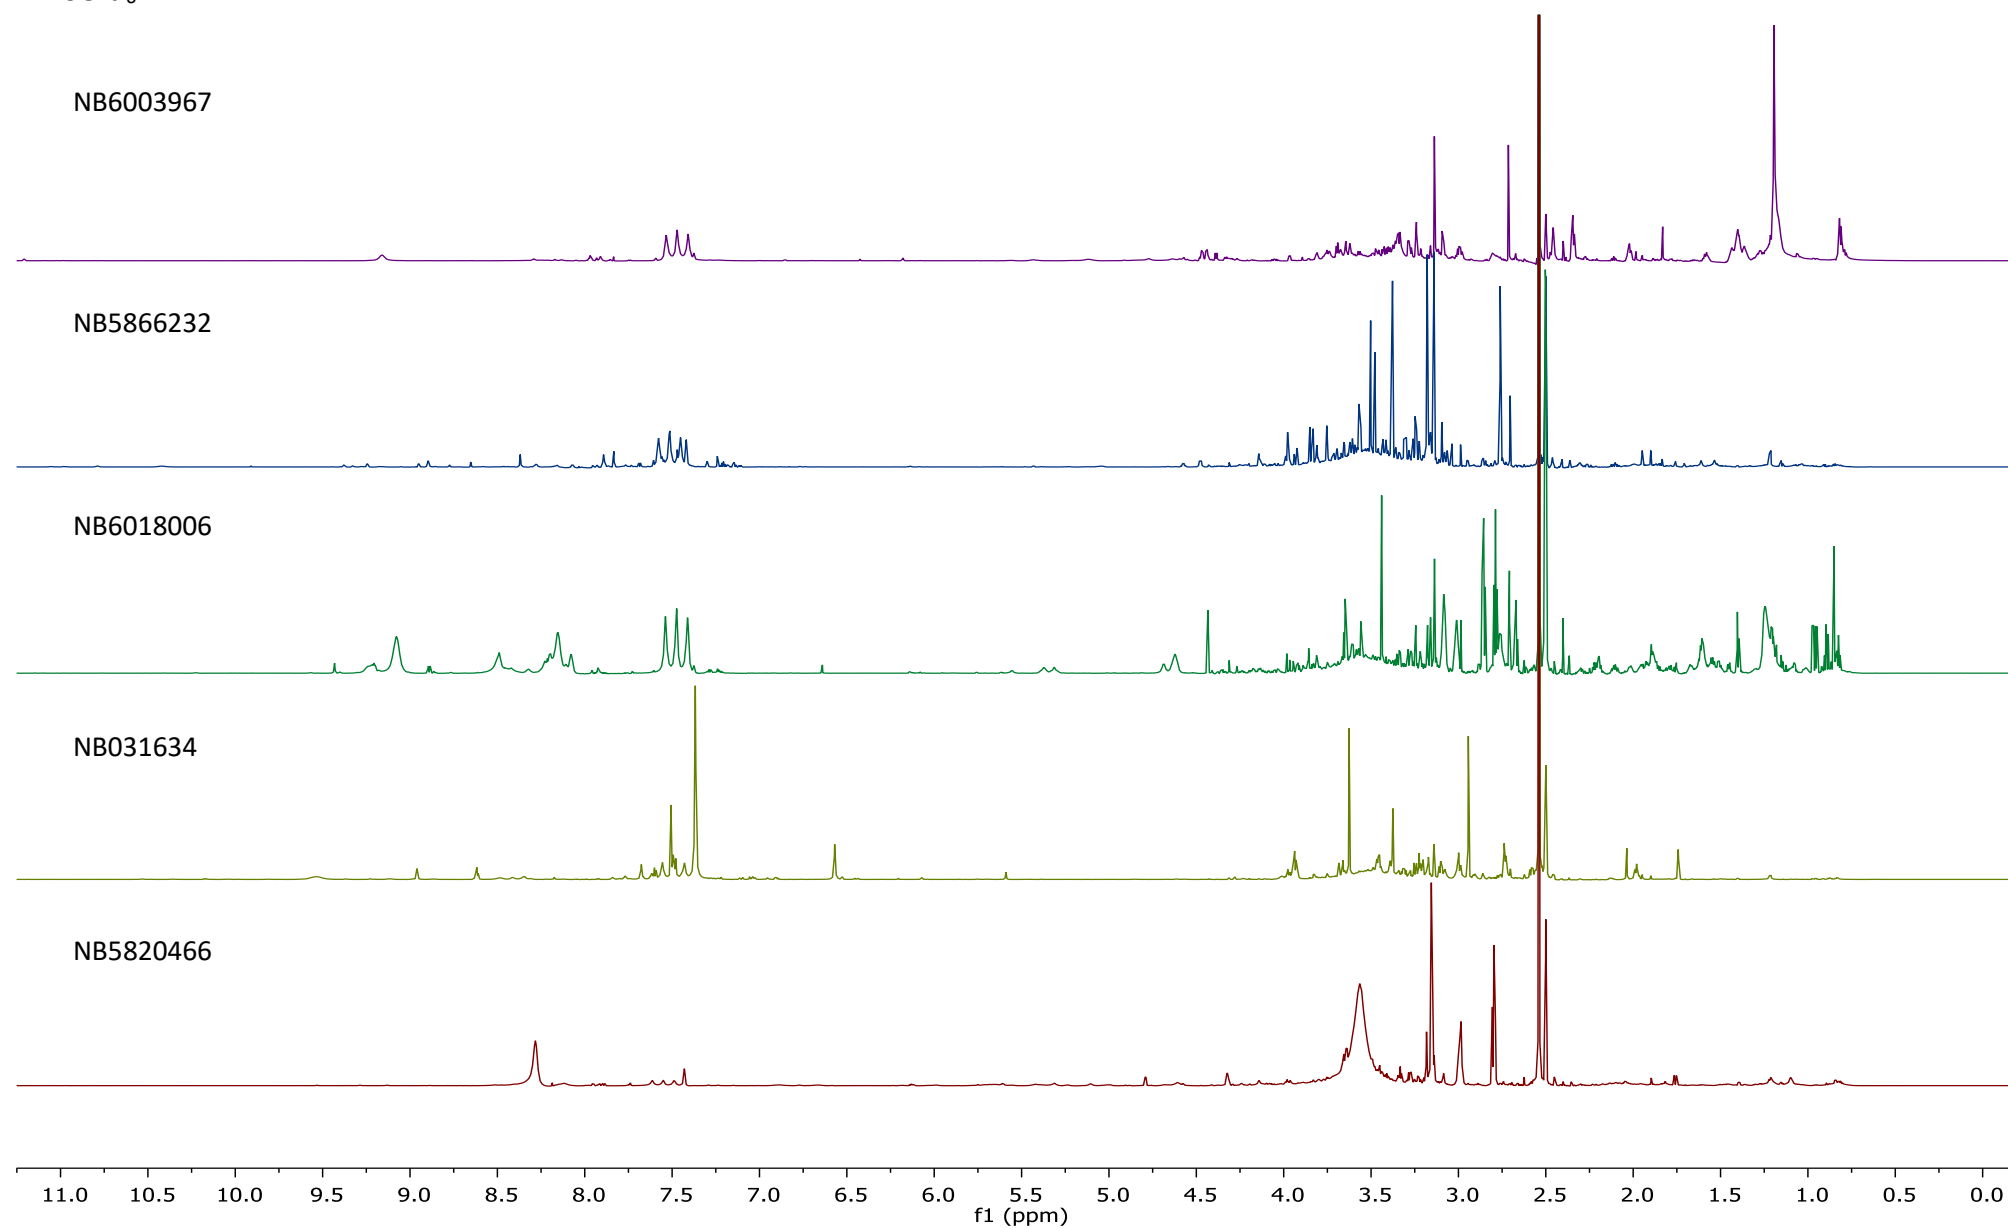

<sup>a</sup>Singlet at  $\delta_{\text{H}}$  2.54 represents DMSO residual peak

**S13**  $^1\text{H}$  NMR (800 MHz) Spectra of *Petromica (Chaladesma) pacifica*, *Polyfibrospongia flabellifera*, *Polycarpa aurata* and *Sarcophyton cherbonnieri* Extracts in  $\text{DMSO}-d_6^a$

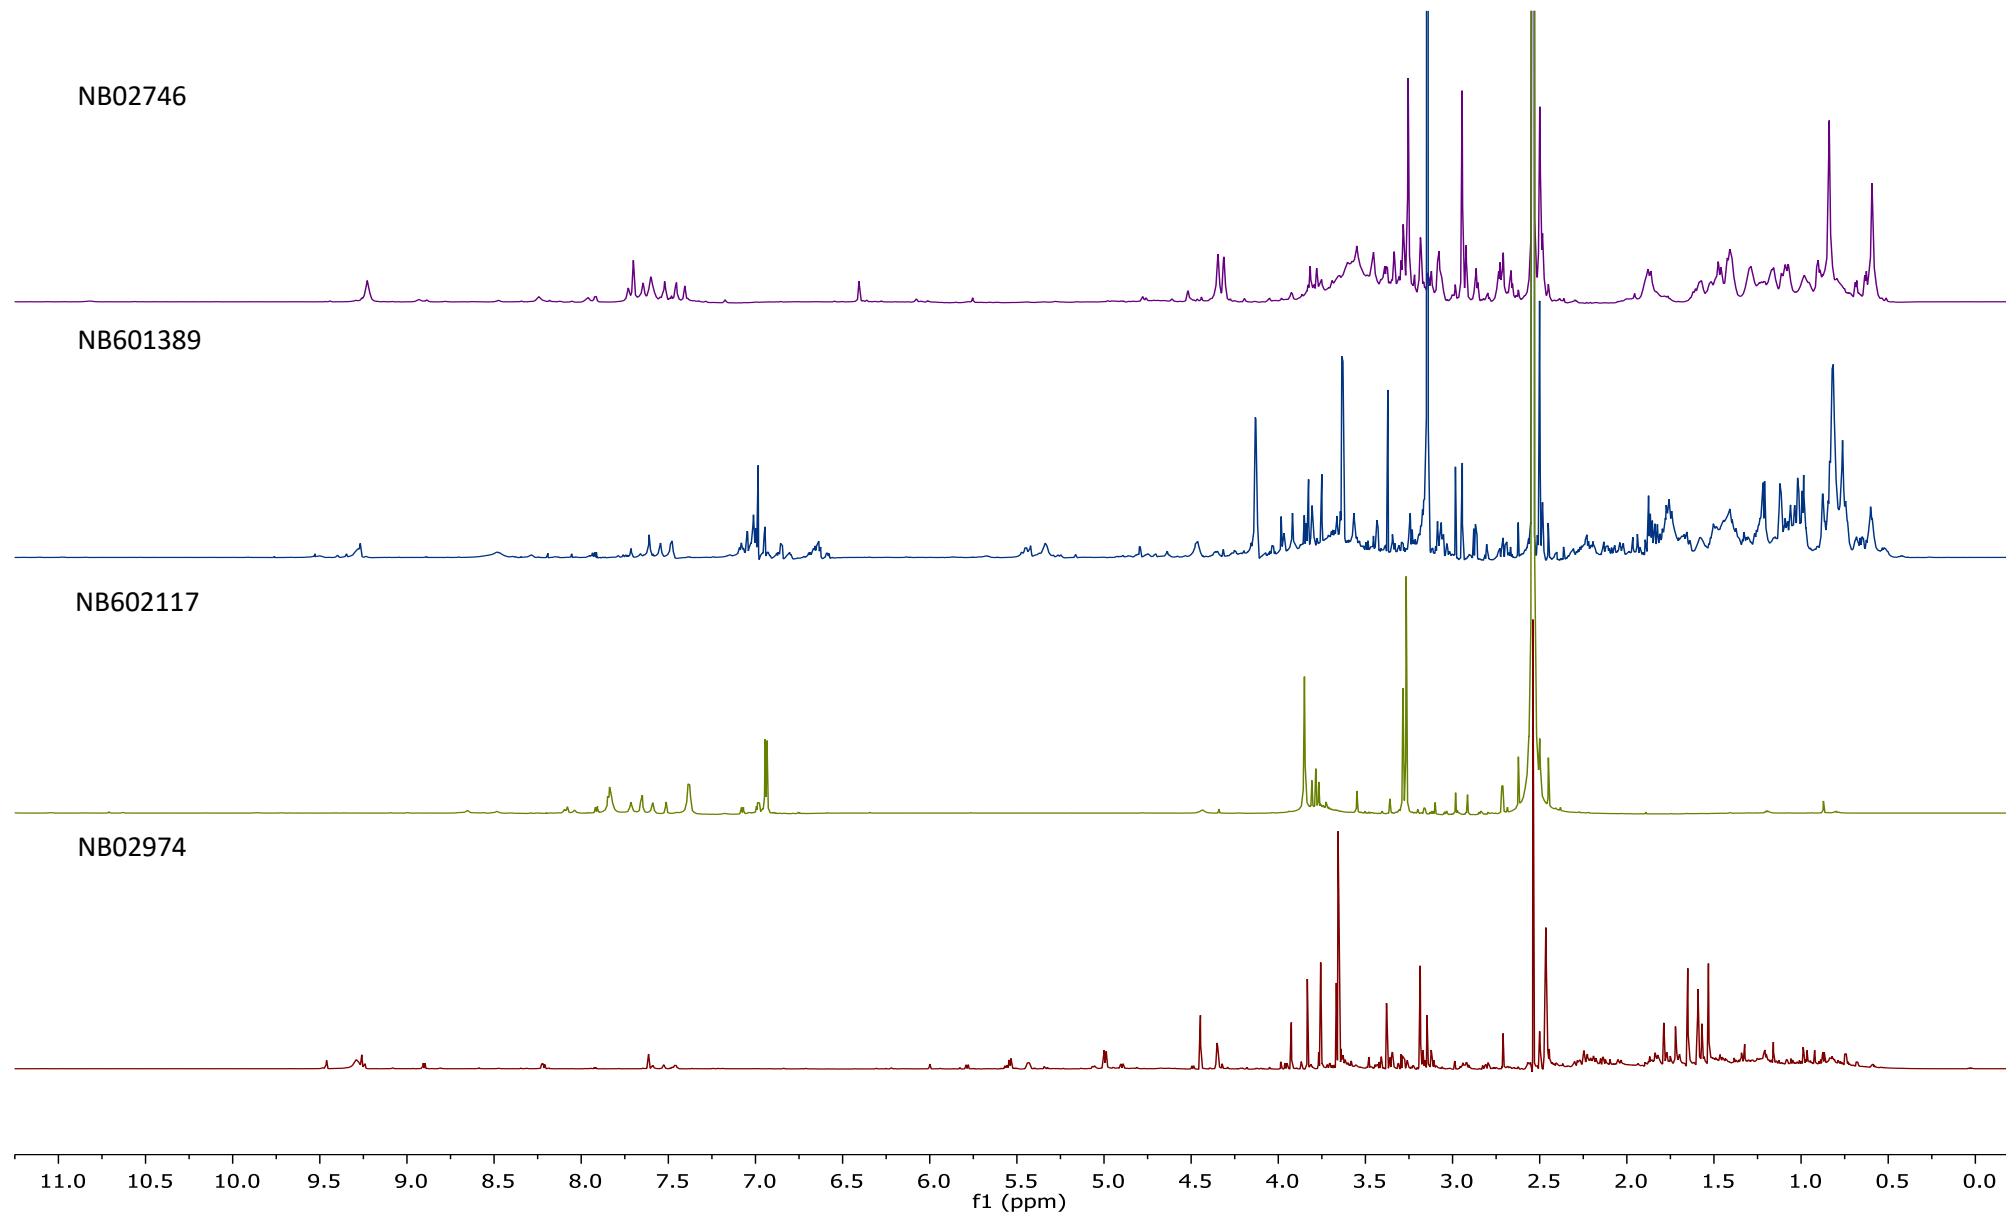

<sup>a</sup>Singlet at  $\delta_{\text{H}}$  2.54 represents DMSO residual peak
